# Supplementary material
Source: publisher figshare collection journal article supplement (https://gsajournals.figshare.com/ndownloader/files/23440967)
Supplement: Supplementary file 1 [file 23440967]

## Sheet: genes down-regulated
gene ID	name	base mean	log2 fold change	p-value	p-adj	description
WBGene00018031	F35B3.4	401.552	-1.65459	6.47734e-22	1.7551e-17	F35B3.4 is an ortholog of human FAM46B (family with sequence similarity 46 member B), FAM46C (family with sequence similarity 46 member C), FAM46D (family with sequence similarity 46 member D) and FAM46A (family with sequence similarity 46 member A); microarray and RNA sequencing studies indicate that F35B3.4 is affected by Heme, Hydrogen sulfide, Nitric Oxide, 1-methylnicotinamide, Nicotinic aci…
WBGene00005832	srw-85	428.163	-1.17437	3.6644e-20	4.96454e-16	srw-85 is an ortholog of human GPR142 (G protein-coupled receptor 142) and GPR139 (G protein-coupled receptor 139); srw-85 is predicted to have G-protein coupled peptide receptor activity, based on protein domain information; srw-85 is expressed in the nervous system.
WBGene00014955	Y102A5C.6	158.03	-0.984942	2.62692e-10	1.18632e-06	Y102A5C.6 is involved in nematode larval development and reproduction.
WBGene00010212	fbxa-192	261.583	-0.900727	2.58187e-08	6.99583e-05	This gene encodes a protein containing an F-box, a motif predicted to mediate protein-protein interactions either with homologs of yeast Skp-1p or with other proteins; this gene's encoded protein also contains an FTH/DUF38 motif, which may also mediate protein-protein interaction.
WBGene00044213	Y102A5C.36	130.8	-0.872385	1.20032e-07	0.000295673	Y102A5C.36 is predicted to have transmembrane signaling receptor activity, based on protein domain information.
WBGene00014954	Y102A5C.5	66.4893	-0.870649	7.07227e-09	2.39538e-05	RNA sequencing and microarray studies indicate that Y102A5C.5 is affected by aak-2, wdr-23, eat-2, ced-3, tatn-1, clk-1, daf-2, daf-16, npr-1, rbr-2, lsm-1, set-25, met-2, dpy-21, and nasp-1; RNA sequencing studies indicate that Y102A5C.5 is enriched in the germ line.
WBGene00007454	C08F11.7	53.5178	-0.862217	3.56858e-10	1.38135e-06	Microarray and RNA sequencing studies indicate that C08F11.7 is affected by Hydrogen sulfide, Nicotinic acid, Methylmercuric chloride, Atrazine, Tetrabromobisphenol A, and adsorbable organic bromine compounds; tiling array and RNA sequencing studies indicate that C08F11.7 is enriched in the coelomocytes and germ line and in the AVA neurons.
WBGene00015990	C18H2.3	119.844	-0.859372	1.27757e-16	1.1539e-12	Microarray, tiling array, and RNA sequencing studies indicate that C18H2.3 is affected by sma-2, rsr-2, nhr-62, eat-2, emr-1, lem-2, ham-3, npr-1, cco-1, jmjd-3.1, mir-243, and nuo-6; microarray and RNA sequencing studies indicate that C18H2.3 is affected by Hydrogen sulfide, Methylmercury hydroxide, Methylmercuric chloride, Paraquat, Dafa#1, and Sirolimus; RNA sequencing studies indicate that C1…
WBGene00014454	MTCE.7	1916.73	-0.738185	8.30144e-06	0.016253	MTCE.7 encodes a mitochondrial 18s ribosomal RNA (rRNA).
WBGene00010958	ndfl-4	69.9904	-0.736948	8.39764e-06	0.016253	The ndfl-4 gene resides on the mitochondrial chromosome, and encodes the protein NADH-ubiquinone oxidoreductase chain 4L; this is the C. elegans homolog of the core MT-ND4L of mitochondrial NADH:ubiquinone oxidoreductase (Complex I).
WBGene00010209	fbxa-191	31.3526	-0.706567	1.12134e-08	3.37597e-05	Microarray and RNA sequencing studies indicate that fbxa-191 is affected by ets-4, pgrn-1, tatn-1, ahr-1, ash-2, wdr-5.1, skn-1, glp-1, daf-16, daf-12, dpy-21, mes-4, aak-2, isp-1, nuo-6, and eat-2; microarray and RNA sequencing studies indicate that fbxa-191 is affected by Methylmercuric chloride, Rotenone, Cadmium, Colistin, and Sirolimus; RNA sequencing studies indicate that fbxa-191 is enrich…
WBGene00007201	exos-4.1	947.231	-0.686503	3.1309e-05	0.0565566	exos-4.1 is an ortholog of human EXOSC4 (exosome component 4); exos-4.1 is involved in body morphogenesis, embryo development, germ cell development, gonad development, nematode larval development and positive regulation of growth.
WBGene00014472	MTCE.33	2189.54	-0.562851	0.000652767	0.930915	MTCE.33 encodes a mitochondrial 23s ribosomal RNA (rRNA).
WBGene00016953	C55C3.3	65.3388	-0.522262	0.00108504	0.999761	C55C3.3 is involved in embryo development.
WBGene00015044	cyp-34A9	82.0243	-0.519606	0.00103244	0.999761	cyp-34A9 is an ortholog of human CYP21A2 (cytochrome P450 family 21 subfamily A member 2) and members of the CYP2 (Cytochrome P4502) family including CYP2E1; cyp-34A9 is involved in determination of adult lifespan; cyp-34A9 is predicted to have heme binding activity, iron ion binding activity, and oxidoreductase activity, acting on paired donors, with incorporation or reduction of molecular oxyge…
WBGene00016506	abhd-5.1	94.9446	-0.509246	0.00193818	0.999761	abhd-5.1 is an ortholog of human ABHD4 (abhydrolase domain containing 4); microarray and RNA sequencing studies indicate that abhd-5.1 is affected by lin-15B, atfs-1, spg-7, wdr-23, clk-1, wdr-5.1, wrn-1, daf-2, htz-1, daf-16, ham-3, swsn-2.2, hsf-1, let-418, chd-3, dpy-21, sir-2.1, hcf-1, and nuo-6; microarray and RNA sequencing studies indicate that abhd-5.1 is affected by Methylmercuric chlori…
WBGene00006650	tts-1	1948.26	-0.499006	0.000280733	0.422596	RNA sequencing and microarray studies indicate that tts-1 is affected by Ethanol, Nitric Oxide, Methylmercury hydroxide, 1-methylnicotinamide, Rotenone, Sodium arsenite, Cry5B, Humic substances, R24, single-walled carbon nanotubes, Dafa#1, and Sirolimus; RNA sequencing and microarray studies indicate that tts-1 is enriched in the germ line and muscle cell.
WBGene00000754	col-181	38.9683	-0.462875	0.00311608	0.999761	col-181 is homologous to the human gene PRO ALPHA 1(I) COLLAGEN (COL1A1; OMIM:120150), which when mutated leads to osteogenesis imperfecta.
WBGene00000430	ceh-5	332.361	-0.456683	0.00621971	0.999761	ceh-5 encodes a homeodomain protein, similar to the human VENTRAL ANTERIOR HOMEO BOX 2 gene (VAX2; OMIM:604295); CEH-5 is dispensable for viability and gross morphology.
WBGene00011232	pck-2	12269.2	-0.435951	0.00914769	0.999761	pck-2 is one of three C. elegans genes that encode proteins with similarity to phosphoenolpyruvate carboxykinase (PEPCK); by similarity, the products of pck-2 are predicted to function in gluconeogenesis.
WBGene00014672	C08F11.6	26.6726	-0.42598	0.000782871	0.999761	RNA sequencing and microarray studies indicate that C08F11.6 is affected by daf-2, daf-16, mir-60, set-25, met-2, daf-12, and dpy-21; RNA sequencing studies indicate that C08F11.6 is affected by Multi-walled carbon nanotubes; RNA sequencing studies indicate that C08F11.6 is enriched in the germ line.
WBGene00015989	C18H2.2	845.99	-0.422273	0.0110752	0.999761	C18H2.2 is involved in lipid storage and meiotic chromosome segregation.
WBGene00018669	F52C6.12	66.0409	-0.410488	0.0126181	0.999761	F52C6.12 is involved in embryo development and lipid storage.
WBGene00002010	hsp-6	10489.3	-0.40481	0.0092333	0.999761	hsp-6 encodes a nuclear-encoded mitochondrion-specific chaperone that is a member of the DnaK/Hsp70 superfamily of molecular chaperones; hsp-6 is involved in the mitochondrial unfolded protein response, as hsp-6 expression, normally broadly detected from the L1 larval through adult stages of development, is greatly increased in response to treatments that disrupt mitochondrial protein handling; l…
WBGene00019189	H11L12.1	57.9631	-0.403217	0.0125681	0.999761	Microarray studies indicate that H11L12.1 is affected by Cholestanol, Chlorpyrifos, Diazinon, single-walled carbon nanotubes, Paraquat, Colistin, and Sirolimus; tiling array, RNA sequencing, and microarray studies indicate that H11L12.1 is enriched in the germ line and hermaphrodite-specific tissues and in neurons including DA, VA, I5, SAB, and retrovesicular ganglion.
WBGene00044107	F58G6.9	158.012	-0.40226	0.0150219	0.999761	F58G6.9 is an ortholog of human SLC31A2 (solute carrier family 31 member 2) and SLC31A1 (solute carrier family 31 member 1); F58G6.9 is predicted to have copper ion transmembrane transporter activity, based on protein domain information.
WBGene00018223	bath-13	37.8442	-0.389752	0.014211	0.999761	Microarray, RNA sequencing, and tiling array studies indicate that bath-13 is affected by clk-1, nhr-114, csr-1, daf-2, hrde-1, hsf-1, rbr-2, glp-1, dpy-21, elli-1, daf-12, daf-16, sir-2.1, mut-2, ain-2, nasp-1, isp-1, nuo-6, and aptf-1; microarray studies indicate that bath-13 is affected by Cadmium; tiling array and RNA sequencing studies indicate that bath-13 is enriched in the coelomocytes an…
WBGene00013039	scav-3	2340.67	-0.388858	0.020222	0.999761	Y49E10.20 encodes a ortholog of human CD36 antigen (OMIM:173510, mutated in platelet glycoprotein IV deficiency); Y49E10.20 is needed for cell corpse engulfment in the germline and in the three-fold embryo, and for migration of the anterior arm of the gonad.
WBGene00013804	Y116A8C.27	661.923	-0.387502	0.0178428	0.999761	Y116A8C.27 is an ortholog of human ATPAF2 (ATP synthase mitochondrial F1 complex assembly factor 2); RNA sequencing and microarray studies indicate that Y116A8C.27 is affected by aak-2, crtc-1, jmjd-3.1, jmjd-1.2, ifg-1, lin-28, hlh-30, sir-2.1, fbf-1, and nuo-6; RNA sequencing and microarray studies indicate that Y116A8C.27 is affected by Cry5B, Quercetin, Humic substances, Sirolimus, and Allant…
WBGene00012564	fbxa-107	357.405	-0.387498	0.020264	0.999761	This gene encodes a protein containing an F-box, a motif predicted to mediate protein-protein interactions either with homologs of yeast Skp-1p or with other proteins; this gene's encoded protein also contains an FTH/DUF38 motif, which may also mediate protein-protein interaction.
WBGene00009628	tatn-1	2114.45	-0.386584	0.019034	0.999761	tatn-1 encodes a putative tyrosine aminotransferase, orthologous to human TAT (OMIM:276600, mutated in type II tyrosinemia); tatn-1 is expressed in larval and adult pharynx, hypodermis, body wall muscle, and intestine, and in adult vulval muscle and reproductive system; tatn-1 is required for the tyrosinemic phenotype of fah-1(RNAi) animals.
WBGene00010295	fbxa-193	74.831	-0.376393	0.0236134	0.999761	RNA sequencing studies indicate that fbxa-193 is affected by Rotenone, Manganese chloride, and D-glucose; RNA sequencing and microarray studies indicate that fbxa-193 is enriched in the germ line and in the I5, DA, SAB, and retrovesicular ganglion.
WBGene00012669	Y39B6A.7	89.0249	-0.368691	0.0260728	0.999761	Tiling array, microarray, and RNA sequencing studies indicate that Y39B6A.7 is affected by hpl-2, clk-1, hsf-1, dpy-21, and daf-12; microarray and RNA sequencing studies indicate that Y39B6A.7 is affected by Methylmercuric chloride, Multi-walled carbon nanotubes, Atrazine, Colistin, and Allantoin; microarray studies indicate that Y39B6A.7 is enriched in neurons.
WBGene00004567	rrn-2.1	644.273	-0.364111	0.0101366	0.999761	rrn-2.1 (F31C3.11) encodes a 5.8s ribosomal RNA (rRNA), a non-coding component of the large ribosomal subunit. This is cleaved from a 45S precursor transcribed by RNA polymerase I; As this forms a major component of the ribosome, it is essential for all protein synthesis in the cell.
WBGene00000801	cars-2	538.966	-0.356338	0.0311196	0.999761	cars-2 is involved in apoptotic process, the molting cycle, positive regulation of growth and reproduction.
WBGene00008677	F11A5.9	337.074	-0.356099	0.0284279	0.999761	F11A5.9 is an ortholog of members of the human SLC (Solute carriers) family including SLC17A1; RNA sequencing and microarray studies indicate that F11A5.9 is affected by 1-methylnicotinamide, Methylmercuric chloride, Ethanol, Cry5B, Acrylamide, Chlorpyrifos, Diazinon, Quercetin, single-walled carbon nanotubes, and Sirolimus; tiling array and RNA sequencing studies indicate that F11A5.9 is enriche…
WBGene00001433	fkb-8	797.776	-0.351869	0.035203	0.999761	fkb-8 encodes a predicted FKBP-type peptidylprolyl isomerase.
WBGene00009412	F35E2.5	45.6619	-0.343581	0.0333676	0.999761	Microarray and RNA sequencing studies indicate that F35E2.5 is affected by Methylmercuric chloride, Rotenone, Resveratrol, Atrazine, Cadmium, Fluoranthene, Paraquat, and Colistin; RNA sequencing studies indicate that F35E2.5 is enriched in the germ line, muscle cell, and male.
WBGene00007950	C35A5.6	133.011	-0.335919	0.0370325	0.999761	Microarray and RNA sequencing studies indicate that C35A5.6 is affected by Mercuric Chloride, Rotenone, Tunicamycin, Quercetin, Humic substances, and Paraquat; tiling array, RNA sequencing, and microarray studies indicate that C35A5.6 is enriched in the body wall muscle cell, hypodermis, germ line, muscle cell, and hermaphrodite-specific tissues and in the dopaminergic, AFD, and PLM neurons.
WBGene00018760	irg-3	209.426	-0.333708	0.0161656	0.999761	irg-3 is involved in innate immune response.
WBGene00007303	rnh-1.3	114.052	-0.331867	0.0464126	0.999761	rnh-1.3 is one of four C. elegans genes that can encode an RNase H ribonuclease; rnh-1.3 transcripts are expressed from the L3 larval stage through adulthood.
WBGene00019197	H14A12.5	34.5615	-0.32923	0.0330069	0.999761	Microarray, RNA sequencing, and tiling array studies indicate that H14A12.5 is affected by cyc-1, sma-2, tatn-1, daf-2, jmjd-3.1, set-25, met-2, elli-1, sir-2.1, tax-6, lin-54, tdp-1, and tbx-2; microarray and RNA sequencing studies indicate that H14A12.5 is affected by Lithium Chloride, Rotenone, Cry5B, Chlorpyrifos, Diazinon, Humic substances, Sirolimus, and Allantoin; tiling array, RNA sequenc…
WBGene00006627	tsp-1	181.175	-0.328891	0.0484389	0.999761	tsp-1 is an ortholog of human CD63 (CD63 molecule); tsp-1 is involved in innate immune response.
WBGene00018817	F54D12.4	108.504	-0.325099	0.0473431	0.999761	F54D12.4 is involved in body morphogenesis, locomotion and nematode larval development.
WBGene00007605	asp-10	190.397	-0.324928	0.044503	0.999761	asp-10 is an ortholog of human CTSE (cathepsin E), pgc (progastricsin), PGA4 (pepsinogen 4, group I (pepsinogen A)) and PGA3 (pepsinogen 3, group I (pepsinogen A)); asp-10 is involved in reproduction; asp-10 is predicted to have aspartic-type endopeptidase activity, based on protein domain information.
WBGene00044038	C47G2.6	12.0097	-0.307675	0.0079208	0.999761	RNA sequencing studies indicate that C47G2.6 is affected by hsf-1.
WBGene00044220	Y102A5C.35	15.1186	-0.29424	0.0184603	0.999761	Y102A5C.35 is involved in locomotion.
WBGene00016450	clec-5	227.298	-0.289412	0.0214196	0.999761	clec-5 is an ortholog of human CLEC3B (C-type lectin domain family 3 member B) and CLEC3A (C-type lectin domain family 3 member A); clec-5 is expressed in the anal depressor muscle, head, intestine, and the rectal gland cell.
WBGene00044800	C56A3.9	47.9347	-0.283143	0.0327513	0.999761	C56A3.9 is involved in apoptotic process, embryo development, nematode larval development and oogenesis.
WBGene00013008	clec-146	38.5606	-0.282566	0.0236094	0.999761	clec-146 is an ortholog of human RP11-277P12.6 and CLECL1 (C-type lectin like 1) and members of the KLR (Killer cell lectin like receptors) family including KLRD1, SCAR (Scavenger receptors) family including OLR1, CD (CD molecules) family including CLEC9A and CLEC (C-type lectin domain containing) family including CLEC12B; RNA sequencing and microarray studies indicate that clec-146 is affected b…
WBGene00015152	B0348.2	62.6197	-0.271031	0.0227344	0.999761	B0348.2 is an ortholog of human CDIP1 (cell death inducing p53 target 1) and LITAF (lipopolysaccharide induced TNF factor); microarray and RNA sequencing studies indicate that B0348.2 is affected by Tunicamycin, Cry5B, Atrazine, Chlorpyrifos, Diazinon, Humic substances, and Paraquat; tiling array and microarray studies indicate that B0348.2 is enriched in the intestine and in neurons.
WBGene00077585	T01G5.8	7.11066	-0.268581	5.69235e-05	0.0964	T01G5.8 is involved in embryo development.
WBGene00044457	C18H7.11	67.1384	-0.268068	0.0343504	0.999761	Tiling array, RNA sequencing, and microarray studies indicate that C18H7.11 is affected by hpl-2, emr-1, lem-2, clk-1, wrn-1, glp-1, mdt-15, npr-1, jmjd-1.2, dop-1, hyl-2, hsf-1, rbr-2, mir-60, let-418, chd-3, daf-16, skn-1, and nasp-1; microarray and RNA sequencing studies indicate that C18H7.11 is affected by Hydrogen sulfide, Tryptophan, D-glucopyranose, and Bisphenol S; tiling array studies i…
WBGene00202498	Y60C6A.2	35.4078	-0.26667	0.00201596	0.999761	RNA sequencing and microarray studies indicate that Y60C6A.2 is affected by cec-4 and sir-2.1; microarray studies indicate that Y60C6A.2 is affected by Tryptophan.
WBGene00007097	B0024.4	151.601	-0.265493	0.0129509	0.999761	B0024.4 is involved in defense response; B0024.4 is localized to the membrane raft.
WBGene00011166	chil-22	29.7782	-0.264252	0.0121109	0.999761	chil-22 is an ortholog of human OVGP1 (oviductal glycoprotein 1) and members of the CHI (Chitinases) family including CHI3L1; chil-22 is predicted to have chitin binding activity, based on protein domain information.
WBGene00005556	sri-44	19.9315	-0.262732	0.0486043	0.999761
WBGene00003093	lys-4	320.354	-0.259832	0.0496152	0.999761	lys-4 is predicted to have lysozyme activity, based on protein domain information.
WBGene00011300	R107.5	18706.3	-0.257712	0.0459146	0.999761	R107.5 is involved in reproduction.
WBGene00007908	C34B4.3	756.324	-0.255709	0.0380984	0.999761	Tiling array, RNA sequencing, and microarray studies indicate that C34B4.3 is affected by hpl-2, wdr-23, eat-2, emr-1, lem-2, prg-1, htz-1, daf-2, mir-35, tbx-2, and ain-2; RNA sequencing and microarray studies indicate that C34B4.3 is affected by Rotenone and Sirolimus; tiling array, RNA sequencing, and microarray studies indicate that C34B4.3 is enriched in neurons including the AFD and ASER ne…
WBGene00015056	B0222.5	156.189	-0.254681	0.0265946	0.999761	B0222.5 is predicted to have serine-type endopeptidase inhibitor activity, based on protein domain information.
WBGene00009533	F38B7.2	450.774	-0.252142	0.0469698	0.999761	F38B7.2 is an ortholog of human TMEM92 (transmembrane protein 92); microarray, tiling array, and RNA sequencing studies indicate that F38B7.2 is affected by clk-1, cyc-1, daf-12, daf-2, cco-1, jmjd-1.2, hsf-1, lin-14, lin-4, dcr-1, crh-1, octr-1, tbx-2, isp-1, nuo-6, pmk-1, and eat-2; RNA sequencing and microarray studies indicate that F38B7.2 is affected by Rotenone, D-glucose, Quercetin, Copper…
WBGene00010424	H36L18.2	72.6864	-0.251748	0.00840056	0.999761	RNA sequencing and microarray studies indicate that H36L18.2 is affected by Rotenone, D-glucose, Cholestanol, Atrazine, Quercetin, Humic substances, Paraquat, Sirolimus, and Ag nanoparticles; RNA sequencing and microarray studies indicate that H36L18.2 is enriched in the germ line, Psub1, Z4, Z1, gon_male_dtc posterior, gon_male_dtc anterior, Z1.p, Z4.a, muscle cell, intestine, body wall musculat…
WBGene00003762	nlp-24	3696.41	-0.251073	0.0433844	0.999761	nlp-24 is involved in response to food; nlp-24 is expressed in the spermatheca, certain amphid neurons, all pharyngeal neurons, hypodermis, and the intestine.
WBGene00022013	Y60C6A.1	58.8116	-0.251072	0.00214569	0.999761	Y60C6A.1 is an ortholog of human TMEM92 (transmembrane protein 92); microarray, RNA sequencing, and tiling array studies indicate that Y60C6A.1 is affected by cyc-1, lin-15B, lin-35, csr-1, wrn-1, rpn-10, elli-1, daf-12, daf-16, sir-2.1, mir-243, and tbx-2; RNA sequencing and microarray studies indicate that Y60C6A.1 is affected by Multi-walled carbon nanotubes, Fluoranthene, Cry5B, Quercetin, Co…
WBGene00019660	K11H12.4	58.0918	-0.249439	0.0460049	0.999761	Microarray and RNA sequencing studies indicate that K11H12.4 is affected by Heme, Diallyl trisulfide, Hydrogen sulfide, Copper sulfate, Rotenone, Tunicamycin, D-glucose, Resveratrol, Chlorpyrifos, Diazinon, Cry5B, Humic substances, Paraquat, Dafa#1, Sirolimus, and Ag nanoparticles; microarray, tiling array, and RNA sequencing studies indicate that K11H12.4 is enriched in the intestine, pharyngeal…
WBGene00002013	hsp-12.6	163.546	-0.247338	0.00444893	0.999761	hsp-12.6 encodes a small heat-shock protein with very short N- and C-terminal domains flanking its central region of similarity to alpha-crystallins; HSP-12.6 is required in vivo for normal lifespan; HSP-12.6 is predominantly and ubiquitously expressed in L1 larvae without any obvious induction by stressors; but, in adult hermaphrodites, at least one HSP-12 is also expressed in spermatids (and pe…
WBGene00007682	C18D11.6	38.0167	-0.246861	0.034813	0.999761	Microarray, tiling array, and RNA sequencing studies indicate that C18D11.6 is affected by cid-1, hpl-2, wdr-23, rsr-2, drh-3, ham-3, swsn-2.2, dop-1, dpy-21, daf-12, cdk-4, and cyd-1; microarray studies indicate that C18D11.6 is affected by Methylmercuric chloride; tiling array studies indicate that C18D11.6 is enriched in the cephalic sheath cell, coelomocytes, excretory cell, germline precurso…
WBGene00016698	C46A5.1	15.9063	-0.245633	0.048789	0.999761	C46A5.1 is an ortholog of human PTPN18 (protein tyrosine phosphatase, non-receptor type 18) and PTPN22 (protein tyrosine phosphatase, non-receptor type 22); C46A5.1 is involved in locomotion and reproduction; C46A5.1 is predicted to have protein tyrosine phosphatase activity, based on protein domain information.
WBGene00018616	F48G7.5	590.584	-0.244287	0.0407493	0.999761	F48G7.5 is involved in oogenesis.
WBGene00019136	F59H6.5	32.7571	-0.243652	0.0163691	0.999761	F59H6.5 is predicted to have DNA helicase activity, based on protein domain information.
WBGene00012790	Y43D4A.4	6.2845	-0.238991	0.000139493	0.222335	Y43D4A.4 is an ortholog of human MFSD7 (major facilitator superfamily domain containing 7); microarray and RNA sequencing studies indicate that Y43D4A.4 is affected by cyc-1, daf-16, and sir-2.1; RNA sequencing studies indicate that Y43D4A.4 is enriched in the germ line.
WBGene00015549	C06G3.3	24.4301	-0.211443	0.00288721	0.999761	Microarray, RNA sequencing, and tiling array studies indicate that C06G3.3 is affected by rheb-1, cyc-1, lin-15B, spe-44, daf-2, rsks-1, ubc-9, clk-1, htz-1, lin-35, daf-16, jmjd-3.1, elli-1, ain-1, and isp-1; microarray and RNA sequencing studies indicate that C06G3.3 is affected by Tunicamycin, Mianserin, Quercetin, single-walled carbon nanotubes, and Sirolimus.
WBGene00017618	F20A1.6	33.8899	-0.204043	0.0329283	0.999761	Microarray and RNA sequencing studies indicate that F20A1.6 is affected by daf-16, cyc-1, nhr-114, eat-2, emr-1, lem-2, clk-1, daf-2, dpy-21, slr-2, isp-1, nuo-6, lin-35, and let-60; RNA sequencing and microarray studies indicate that F20A1.6 is affected by Rotenone, Chlorpyrifos, and Quercetin; proteomic, microarray, tiling array, and RNA sequencing studies indicate that F20A1.6 is enriched in t…
WBGene00008396	D1086.9	27.038	-0.200989	0.00722233	0.999761	D1086.9 is an ortholog of human CLIC6 (chloride intracellular channel 6), SAMD15 (sterile alpha motif domain containing 15) and MDN1 (midasin AAA ATPase 1); microarray and RNA sequencing studies indicate that D1086.9 is affected by age-1, daf-2, rsks-1, prg-1, clk-1, daf-16, and hrp-2; RNA sequencing and microarray studies indicate that D1086.9 is affected by Rotenone, Multi-walled carbon nanotub…
WBGene00017691	ilys-5	19.7308	-0.197693	0.0174397	0.999761	ilys-5 is involved in embryo development; ilys-5 is predicted to have lysozyme activity, based on protein domain information; ilys-5 is expressed in the intestine.
WBGene00018385	F43C11.8	15.6004	-0.163825	0.0317158	0.999761	F43C11.8 is an ortholog of members of the human TRIM (Tripartite motif containing) family including TRIM59 and RNF (Ring finger proteins) family including RNF224; F43C11.8 is predicted to have zinc ion binding activity, based on protein domain information.
WBGene00017371	sre-39	4.05118	-0.156984	0.00221411	0.999761	Tiling array, RNA sequencing, and microarray studies indicate that sre-39 is affected by rsr-2, tatn-1, csr-1, clk-1, jmjd-3.1, and sir-2.1; microarray studies indicate that sre-39 is affected by Methylmercuric chloride and Resveratrol.
WBGene00189961	Y54G2A.57	17.0927	-0.151776	0.0262173	0.999761	Microarray and RNA sequencing studies indicate that Y54G2A.57 is affected by nhr-114, clk-1, wrn-1, and daf-2; RNA sequencing studies indicate that Y54G2A.57 is enriched in the male.
WBGene00020178	T02H6.8	3.70123	-0.144824	0.00351241	0.999761	Tiling array studies indicate that T02H6.8 is affected by hpl-2; microarray studies indicate that T02H6.8 is affected by Methylmercuric chloride and Allantoin; tiling array studies indicate that T02H6.8 is enriched in the NSM neurons.
WBGene00010172	oac-36	4.80821	-0.142847	0.0240533	0.999761	oac-36 is predicted to have transferase activity, transferring acyl groups other than amino-acyl groups, based on protein domain information.
WBGene00005040	sra-14	4.74573	-0.139004	0.0257923	0.999761	sra-14 is predicted to have G-protein coupled receptor activity, based on protein domain information; sra-14 is expressed in the nervous system, reproductive system, and the intestine.
WBGene00045311	Y57G11C.57	3.37507	-0.131309	0.00574336	0.999761	Microarray studies indicate that Y57G11C.57 is affected by wdr-5.1.
WBGene00044293	K08D12.7	3.3679	-0.127986	0.00622709	0.999761	Tiling array and microarray studies indicate that K08D12.7 is affected by hpl-2, rsr-2, ubc-9, clk-1, elli-1, and let-60; RNA sequencing studies indicate that K08D12.7 is affected by Multi-walled carbon nanotubes.
WBGene00044390	ZK177.11	3.23104	-0.126601	0.00696446	0.999761	ZK177.11 is involved in cell division; ZK177.11 is predicted to have protein dimerization activity, based on protein domain information.
WBGene00022218	Y73B3A.16	8.81577	-0.109486	0.0463346	0.999761	Y73B3A.16 is an ortholog of members of the human CLK (CDC like kinases) family including CLK4; Y73B3A.16 is predicted to have ATP binding activity and protein kinase activity, based on protein domain information.
WBGene00044317	F41G3.19	2.75482	-0.108349	0.0142114	0.999761	Tiling array and RNA sequencing studies indicate that F41G3.19 is affected by rsr-2 and dpy-21.
WBGene00044015	K06A4.8	2.75482	-0.108349	0.0142114	0.999761	RNA sequencing and microarray studies indicate that K06A4.8 is affected by wdr-23, eat-2, clk-1, and swsn-2.2; RNA sequencing and microarray studies indicate that K06A4.8 is affected by Manganese chloride and Colistin; RNA sequencing studies indicate that K06A4.8 is enriched in the germ line.
WBGene00013867	ZC373.2	2.57985	-0.102349	0.0182523	0.999761	Microarray and RNA sequencing studies indicate that ZC373.2 is affected by Heme, Ethanol, Rotenone, Chlorpyrifos, Diazinon, and Sirolimus; tiling array and RNA sequencing studies indicate that ZC373.2 is enriched in the germ line and in the dopaminergic neurons.
WBGene00018028	F35B3.1	3.11911	-0.10007	0.0142634	0.999761	F35B3.1 is predicted to have thiol-dependent ubiquitinyl hydrolase activity, based on protein domain information.
WBGene00219235	K03B4.8	2.2703	-0.0899389	0.0299503	0.999761	RNA sequencing studies indicate that K03B4.8 is affected by Multi-walled carbon nanotubes; RNA sequencing studies indicate that K03B4.8 is enriched in the amphid sheath cell.
WBGene00012846	srxa-14	2.25824	-0.0885412	0.0312221	0.999761	srxa-14 is expressed in the pharynx, hypodermis, nervous system, intestine, and the rectal gland cell.
WBGene00012877	Y45F10C.1	2.24162	-0.0852632	0.0342158	0.999761	Y45F10C.1 is involved in locomotion.
WBGene00006208	str-163	2.62252	-0.084212	0.0283054	0.999761	str-163 is expressed in the nervous system and the intestine; str-163 is localized to the non-motile cilium.
WBGene00015982	bgnt-1.4	1.94527	-0.0790433	0.0481981	0.999761	bgnt-1.4 is an ortholog of human B4GAT1 (beta-1,4-glucuronyltransferase 1); tiling array and microarray studies indicate that bgnt-1.4 is affected by hpl-2, nhr-114, ubc-9, sir-2.1, aak-2, and tax-6; RNA sequencing and microarray studies indicate that bgnt-1.4 is affected by Methylmercury hydroxide, Methylmercuric chloride, Tunicamycin, Cadmium, Paraquat, and Dafa#1; RNA sequencing studies indica…
WBGene00005178	srg-21	1.94527	-0.0790433	0.0481981	0.999761	srg-21 is predicted to have transmembrane signaling receptor activity, based on protein domain information.
WBGene00011429	T04C12.7	6.66776	-0.0784563	0.00781709	0.999761	RNA sequencing, microarray, and tiling array studies indicate that T04C12.7 is affected by wdr-23, eat-2, emr-1, lem-2, bar-1, clk-1, wrn-1, daf-2, ham-3, npr-1, set-25, met-2, dpy-21, elli-1, and daf-16; microarray and RNA sequencing studies indicate that T04C12.7 is affected by Tunicamycin, Manganese chloride, D-glucose, and Colistin; tiling array studies indicate that T04C12.7 is enriched in t…
WBGene00016696	srbc-19	2.12855	-0.0783942	0.043731	0.999761	Tiling array, RNA sequencing, and microarray studies indicate that srbc-19 is affected by rsr-2, pgrn-1, clk-1, and dpy-21; microarray studies indicate that srbc-19 is affected by Aldicarb and Atrazine; RNA sequencing studies indicate that srbc-19 is enriched in the germ line.
WBGene00013064	clec-248	4.92125	-0.0739519	0.0398193	0.999761	Tiling array and microarray studies indicate that clec-248 is affected by rsr-2, lin-14, and lin-4.
WBGene00013063	clec-249	4.76289	-0.0730173	0.0426043	0.999761
WBGene00045338	M01B2.13	3.84219	-0.0699922	0.0251616	0.999761	M01B2.13 is an ortholog of human PHYHIP (phytanoyl-CoA 2-hydroxylase interacting protein) and PHYHIPL (phytanoyl-CoA 2-hydroxylase interacting protein like); microarray and RNA sequencing studies indicate that M01B2.13 is affected by bar-1, clk-1, wrn-1, daf-2, daf-16, hsf-1, and daf-12; RNA sequencing studies indicate that M01B2.13 is affected by Bisphenol A.
WBGene00189932	Y26G10.7	7.2846	-0.0542451	0.0193902	0.999761	Microarray and RNA sequencing studies indicate that Y26G10.7 is affected by nhr-114, clk-1, daf-2, daf-12, daf-16, and dpy-21.
WBGene00022731	ZK402.5	7.01792	-0.0534574	0.0211804	0.999761	RNA sequencing and microarray studies indicate that ZK402.5 is affected by rde-12, clk-1, daf-16, dop-1, dpy-21, sir-2.1, glp-1, aak-2, cdk-4, cyd-1, gei-8, tbx-2, ain-2, and let-60; microarray studies indicate that ZK402.5 is affected by Resveratrol, Atrazine, Chlorpyrifos, Diazinon, Humic substances, adsorbable organic bromine compounds, Sirolimus, and Allantoin; RNA sequencing and microarray s…
WBGene00206499	C06H5.11	5.38427	-0.0480196	0.0380423	0.999761
WBGene00011245	R11D1.4	4.75082	-0.0454293	0.0492419	0.999761	Tiling array and microarray studies indicate that R11D1.4 is affected by rsr-2, daf-2, and sir-2.1; microarray studies indicate that R11D1.4 is affected by Dafa#1 and Sirolimus; tiling array studies indicate that R11D1.4 is enriched in neurons.
Table S2. List of genes significantly down-regulated in the cnd-1(ju29) comparative transcriptome. Gene ID, gene identity; gene name, commonly used gene name/cosmid name; Base mean, mean of normalized counts for that gene; log2 fold-change, change in gene expression level when compared to wild type; P-value, significance; P-adj, significance when adjusted for false discovery rate (Benjamini and H…
